# Supplementary material
Source: Copernicus journal article supplement (doi:10.5194/amt-19-4313-2026)
Supplement: Supplementary file 1 [file amt-19-4313-2026-supplement.pdf]

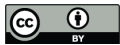

*Supplement of*

**Enhanced methane monitoring: a globally harmonized daily  
0.1° XCH<sub>4</sub> through machine learning-based fusion of GOSAT,  
GOSAT-2, and TROPOMI**

**Jebun Naher Keya et al.**

*Correspondence to:* Jungho Im (ersgis@unist.ac.kr)

The copyright of individual parts of the supplement might differ from the article licence.

15 **Supplementary**

16

17 **Equations S1–S3 (Statistical Metrics for Model Performance Evaluation)**

18 Model performance was evaluated using four standard statistical metrics: coefficient of  
19 determination ( $R^2$ ; Eq. S1), root mean square error (RMSE; Eq. S2) and mean absolute error  
20 (MAE; Eq. S3).

21 
$$R^2 = 1 - \frac{\sum_i (y_i - \hat{y}_i)^2}{\sum_i (y_i - \bar{y})^2} \quad (S1)$$

22 
$$RMSE = \sqrt{\frac{1}{n} \sum_{i=1}^n (\hat{y}_i - y_i)^2} \quad (S2)$$

23 
$$MAE = \frac{1}{n} \sum_{i=1}^n |\hat{y}_i - y_i| \quad (S3)$$

24

25 In the equation,  $\hat{y}_i$  represents the predicted value,  $y_i$  is observed value,  $\bar{y}$  is the mean of  
26 observed values, and  $n$  is the total number of samples.

27 **Table S1.** GOSAT XCH<sub>4</sub> retrieval parameters used to estimate  $\Delta(\text{GOSAT} - \text{TCCON})$  in Step 1.

| <b>GOSAT predictor variables</b>                           | <b>Units</b>         |
|------------------------------------------------------------|----------------------|
| 1. Bias corrected XCO <sub>2</sub> retrieved               | ppb                  |
| 1. Aerosol Optical Thickness (AOT1 & 2)                    | -                    |
| 2. Cirrus Optical Thickness                                | -                    |
| 3. Longitude                                               | degree               |
| 4 Reference CO <sub>2</sub> Profile (total)                | ppb                  |
| 5. Reference CO <sub>2</sub> Profile 1                     | Mol cm <sup>-2</sup> |
| 6. Satellite zenith                                        | degree               |
| 7. Reference pressure – retrieved pressure ( $\Delta P$ s) | hPa                  |
| 8. Temperature shift                                       | K                    |

28

29 **Table S2.** GOSAT-2 XCH<sub>4</sub> retrieval parameters used to estimate  $\Delta(\text{GOSAT-2-TCCON})$  in  
 30 Step 1.

| <b>GOSAT-2 predictor variables</b>                          | <b>Units</b> |
|-------------------------------------------------------------|--------------|
| 1. Reference pressure – retrieved pressure ( $\Delta P_s$ ) | hPa          |
| 2. XCO <sub>2</sub> retrieved                               | -            |
| 3. H <sub>2</sub> O Profile uncertainty                     | ppb          |
| 4. Longitude                                                | degree       |
| 5. XCH <sub>4</sub> Degrees of Freedom                      | -            |
| 6. Pressure level                                           | hPa          |
| 7. Solar Zenith Angle (SZA)                                 | degree       |
| 8. Column averaging kernel vertical level 1                 | -            |
| 9. Fluorescent Slope                                        | -            |
| 10. Aerosol Optical Thickness Type1 + Type2 (total)         | -            |
| 11. Residual Chi-Squared : Band 3                           | -            |

31

32 **Table S3.** TROPOMI XCH<sub>4</sub> retrieval parameters used to estimate  $\Delta(\text{TROPOMI}-\text{TCCON})$  in  
 33 Step 1 and  $\Delta(\text{TROPOMI}-\text{GOSAT-2})$  in Step 2.

| <b>TROPOMI predictor variables</b>               | <b>Units</b>                                                          |
|--------------------------------------------------|-----------------------------------------------------------------------|
| 1. XCH <sub>4</sub> precision                    | ppb                                                                   |
| 2. Fluorescence                                  | mol s <sup>-1</sup> m <sup>-2</sup> nm <sup>-1</sup> sr <sup>-1</sup> |
| 3–4. CO total column and precision               | mol m <sup>-2</sup>                                                   |
| 5–6. H <sub>2</sub> O total column and precision | mol m <sup>-2</sup>                                                   |
| 7–8. Aerosol size and precision                  | -                                                                     |
| 9–10. Aerosol height and precision               | m                                                                     |
| 11–12. Aerosol column and precision              | m <sup>-2</sup>                                                       |
| 13–14. NIR surface albedo and precision          | -                                                                     |
| 15–16. SWIR surface albedo and precision         | -                                                                     |
| 17. NIR aerosol optical thickness                | -                                                                     |
| 18. SWIR aerosol optical thickness               | -                                                                     |
| 19. NIR chi-square                               | -                                                                     |
| 20. SWIR chi-square                              | -                                                                     |
| 22. Solar zenith angle (SOZ)                     | degree                                                                |
| 23. Solar azimuth angle (SOA)                    | degree                                                                |
| 24. Satellite zenith angle (SAZ)                 | degree                                                                |
| 25. Satellite azimuth angle (SAA)                | degree                                                                |
| 26. Surface altitude                             | m                                                                     |
| 27. Surface classification                       | -                                                                     |
| 28. U10 wind speed (U10)                         | m s <sup>-1</sup>                                                     |
| 29. V10 wind speed (V10)                         | m s <sup>-1</sup>                                                     |
| 30. NIR cirrus reflectance                       | -                                                                     |
| 31. SWIR cirrus reflectance                      | -                                                                     |
| 32. XCH <sub>4</sub> profile a priori            | mol m <sup>-2</sup>                                                   |

34

35 **Table S4.** GOSAT XCH<sub>4</sub> retrieval parameters used to estimate  $\Delta(\text{GOSAT} - \text{GOSAT-2})$  in Step  
 36 2.

| <b>GOSAT predictor variables</b>                                  | <b>Units</b>         |
|-------------------------------------------------------------------|----------------------|
| 1. Surface pressure                                               | hPa                  |
| 2. Reference surface pressure                                     | hPa                  |
| 3. Total column of dry air molecules                              | Mol cm <sup>-2</sup> |
| 4. $\Delta P$ s : reference pressure – retrieved pressure         | hPa                  |
| 5. Altitude (height)                                              | m                    |
| 6. Retrieved XCO <sub>2</sub>                                     | ppb                  |
| 7. Bias corrected XCO <sub>2</sub>                                | ppb                  |
| 8–19. Reference CO <sub>2</sub> profile at pressure levels P4–P15 | Mol cm <sup>-2</sup> |
| 20. Total reference CO <sub>2</sub> profile column                | Mol cm <sup>-2</sup> |
| 21. Vertically integrated CH <sub>4</sub> column                  | Mol cm <sup>-2</sup> |
| 22. Aerosol Optical Thickness type-2                              | -                    |
| 23. Air mass                                                      | -                    |
| 24–25. Residual mean square                                       | -                    |
| 26. Column averaging kernel vertical level 6                      | -                    |

37

38 **Table S5.** Cross-validation results comparing Random Forest (RF) and eXtreme Gradient  
 39 Boosting (XGBoost) for TROPOMI, GOSAT, and GOSAT-2 bias correction against TCCON.  
 40 For each metric, the better-performing value between the two algorithms is shown in bold.

|         |                | RF                  |                     |                     | XGBoost      |              |              |
|---------|----------------|---------------------|---------------------|---------------------|--------------|--------------|--------------|
| CV type |                | LOSOCV <sup>a</sup> | LOMOCV <sup>b</sup> | LOYOCV <sup>c</sup> | LOSOCV       | LOMOCV       | LOYOCV       |
| TROPOMI | N              | 5,156               |                     |                     |              |              |              |
|         | R <sup>2</sup> | 0.78                | 0.82                | 0.81                | <b>0.79</b>  | <b>0.84</b>  | <b>0.82</b>  |
|         | MAE (ppb)      | 10.48               | 9.34                | 9.39                | <b>10.20</b> | <b>8.83</b>  | <b>9.17</b>  |
|         | RMSE (ppb)     | 13.94               | 12.78               | 12.87               | <b>13.58</b> | <b>12.06</b> | <b>12.57</b> |
|         | N              | 702                 |                     |                     |              |              |              |
| GOSAT   | R <sup>2</sup> | <b>0.87</b>         | <b>0.88</b>         | <b>0.86</b>         | 0.86         | 0.88         | 0.86         |
|         | MAE (ppb)      | <b>8.20</b>         | <b>7.66</b>         | <b>8.42</b>         | 8.43         | 7.72         | 8.53         |
|         | RMSE (ppb)     | <b>10.85</b>        | <b>10.16</b>        | <b>11.09</b>        | 11.13        | 10.22        | 11.19        |
| GOSAT-2 | N              | 1,751               |                     |                     |              |              |              |
|         | R <sup>2</sup> | <b>0.88</b>         | <b>0.91</b>         | <b>0.89</b>         | 0.88         | 0.90         | 0.89         |
|         | MAE (ppb)      | <b>7.68</b>         | <b>7.07</b>         | <b>7.45</b>         | 7.89         | 7.19         | 7.67         |
|         | RMSE (ppb)     | <b>10.96</b>        | <b>9.86</b>         | <b>10.65</b>        | 11.22        | 10.04        | 10.84        |

41 <sup>a</sup> LOSOCV: Leave-One-Site-Out Cross-Validation

42 <sup>b</sup> LOMOCV: Leave-One-Month-Out Cross-Validation

43 <sup>c</sup> LOYOCV: Leave-One-Year-Out Cross-Validation

44

45 **Table S6.** Cross-validation results comparing Random Forest (RF), eXtreme Gradient  
 46 Boosting (XGBoost) for TROPOMI and GOSAT bias correction against best-performing ML-  
 47 based bias-corrected GOSAT-2. For each metric, the better-performing value between the two  
 48 algorithms is shown in bold.

|         |                | RF                  |                     |                     | XGBoost     |             |             |
|---------|----------------|---------------------|---------------------|---------------------|-------------|-------------|-------------|
|         | CV type        | LOBOCV <sup>a</sup> | LOMOCV <sup>b</sup> | LOYOCV <sup>c</sup> | LOBOCV      | LOMOCV      | LOYOCV      |
| TROPOMI | N              | 183,550             |                     |                     |             |             |             |
|         | R <sup>2</sup> | 0.86                | 0.87                | 0.87                | <b>0.91</b> | <b>0.92</b> | <b>0.92</b> |
|         | MAE (ppb)      | 8.50                | 8.13                | 8.18                | <b>6.78</b> | <b>6.32</b> | <b>6.59</b> |
|         | RMSE (ppb)     | 11.18               | 10.72               | 10.78               | <b>9.07</b> | <b>8.49</b> | <b>8.82</b> |
|         | N              | 32,244              |                     |                     |             |             |             |
| GOSAT   | R <sup>2</sup> | 0.91                | 0.92                | 0.91                | <b>0.92</b> | <b>0.92</b> | <b>0.92</b> |
|         | MAE (ppb)      | 7.22                | 7.00                | 7.38                | <b>7.06</b> | <b>6.86</b> | <b>7.11</b> |
|         | RMSE (ppb)     | 9.80                | 9.50                | 9.94                | <b>9.56</b> | <b>9.33</b> | <b>9.64</b> |

49 <sup>a</sup> LOBOCV: Leave-One-Band-Out Cross-Validation

50 <sup>b</sup> LOMOCV: Leave-One-Month-Out Cross-Validation

51 <sup>c</sup> LOYOCV: Leave-One-Year-Out Cross-Validation

52

53 **Table S7.** Seasonal hemispheric and high-emission zone mean XCH<sub>4</sub> concentrations in 2023.  
 54 Values represent area-weighted seasonal means and spatial standard deviations indicating  
 55 spatial variability within each region. Amplitude represents the seasonal range (maximum  
 56 minus minimum concentration) for each region per season.

| Region | MAM (ppb)       | JJA (ppb)       | SON (ppb)       | DJF (ppb)       | Amplitude (ppb) |
|--------|-----------------|-----------------|-----------------|-----------------|-----------------|
| 0–40N  | 1903.71 ± 10.04 | 1901.18 ± 6.27  | 1917.13 ± 10.69 | 1917.68 ± 9.38  | 16.50           |
| 0–80N  | 1883.22 ± 25.05 | 1889.30 ± 16.68 | 1903.46 ± 21.91 | 1915.36 ± 10.09 | 32.14           |
| 60S–0  | 1850.66 ± 31.90 | 1857.43 ± 24.52 | 1856.62 ± 25.22 | 1854.55 ± 29.29 | 6.77            |

57 Note- NH: Northern Hemisphere (0–80°N); High-emission zone (0–40°N); SH: Southern  
 58 Hemisphere (60°S–0°). MAM, JJA, SON, and DJF represent March–May, June–August,  
 59 September–November, and December–February, respectively.  
 60

61 **Figure S1.** Spatial cross-validation (SPCV) fold distribution for latitudinal generalization  
62 assessment. The bias correction models were evaluated using leave-one-band-out cross-  
63 validation (LOBOCV) across eleven latitude-based folds spanning 60°S–80°N.  
64

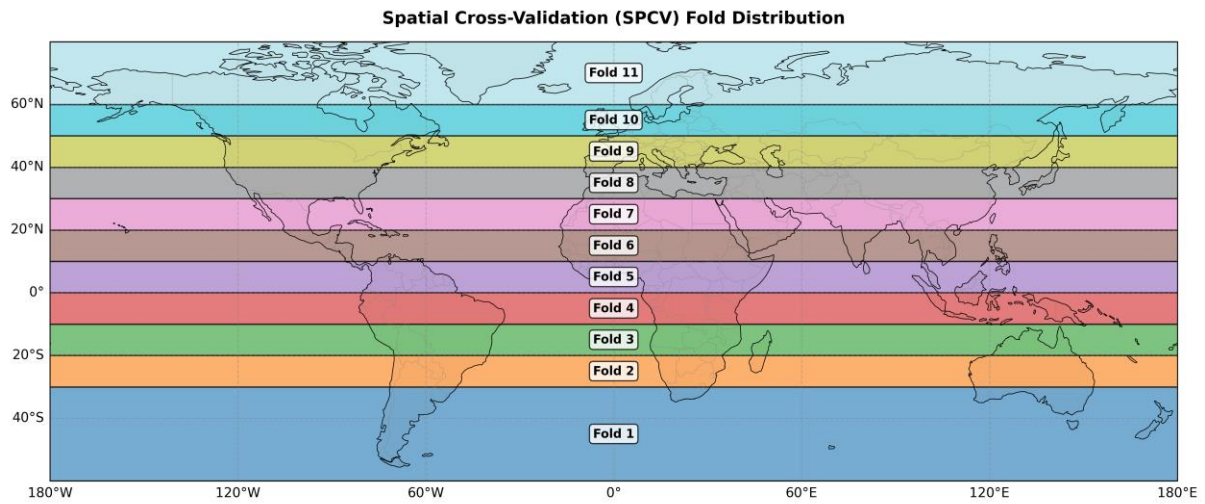

65  
66

67 **Figure S2.** Comparison of operational TROPOMI products (TROPOMI standard and bias  
 68 correction) and machine-learning based bias correction result (ML Bias correction) with  
 69 TCCON XCH<sub>4</sub> (GGG2020 version). Shown are the mean ( $\mu$ ) and standard deviation ( $\sigma$ ) of the  
 70 TROPOMI–TCCON XCH<sub>4</sub> differences for colocated observations during 2020–2023. Station  
 71 locations are summarized in Table 1 and mapped in Fig. 1.

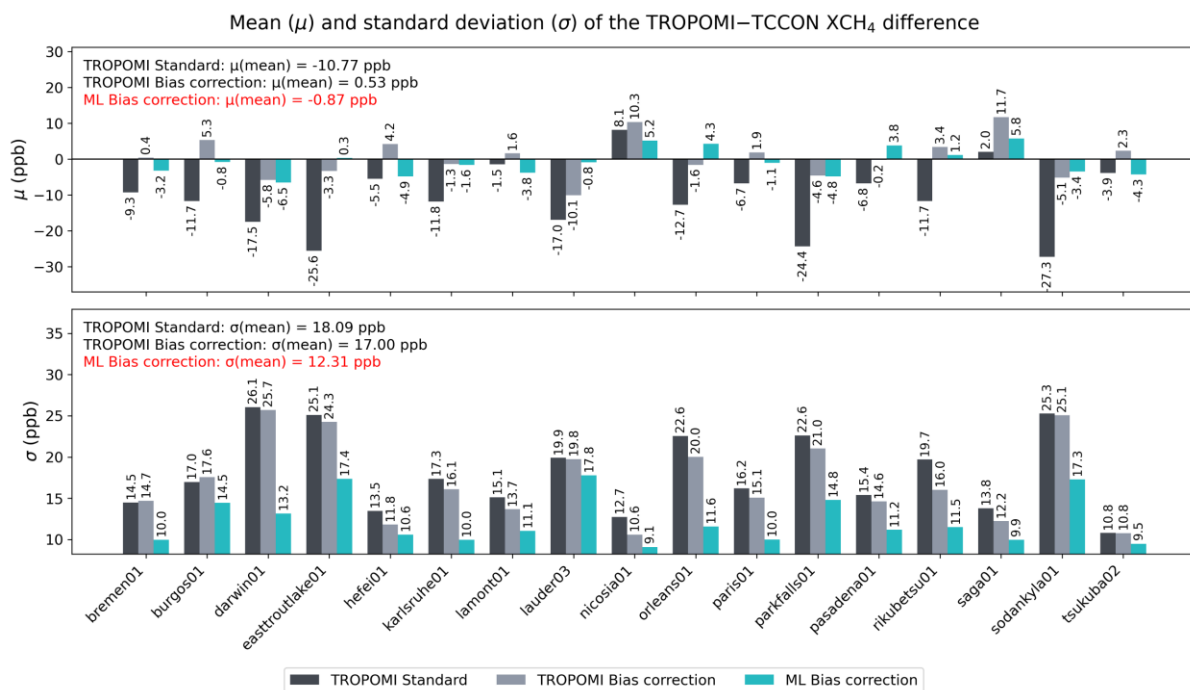

72  
73

74 **Figure S3.** Comparison of operational GOSAT products (GOSAT standard and bias correction)  
 75 and machine-learning based bias correction result (ML Bias correction) with TCCON XCH<sub>4</sub>  
 76 (GGG2020 version). Shown are the mean ( $\mu$ ) and standard deviation ( $\sigma$ ) of the GOSAT–  
 77 TCCON XCH<sub>4</sub> differences for colocated observations during 2020–2023. Station locations are  
 78 summarized in Table 1 and mapped in Fig. 1.

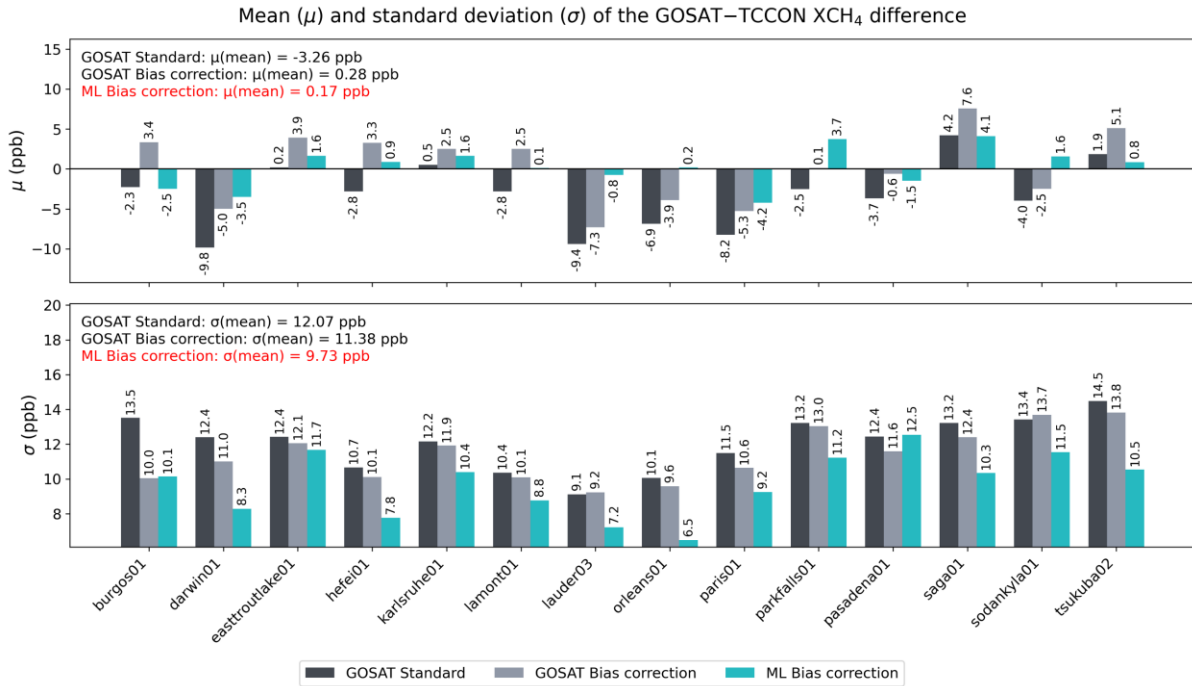

79  
80

81 **Figure S4.** Comparison of operational GOSAT-2 standard product and machine-learning based  
 82 bias correction result (ML Bias correction) with TCCON XCH<sub>4</sub> (GGG2020 version). Shown  
 83 are the mean ( $\mu$ ) and standard deviation ( $\sigma$ ) of the GOSAT-2–TCCON XCH<sub>4</sub> differences for  
 84 colocated observations during 2020–2023. Station locations are summarized in Table 1 and  
 85 mapped in Fig. 1.

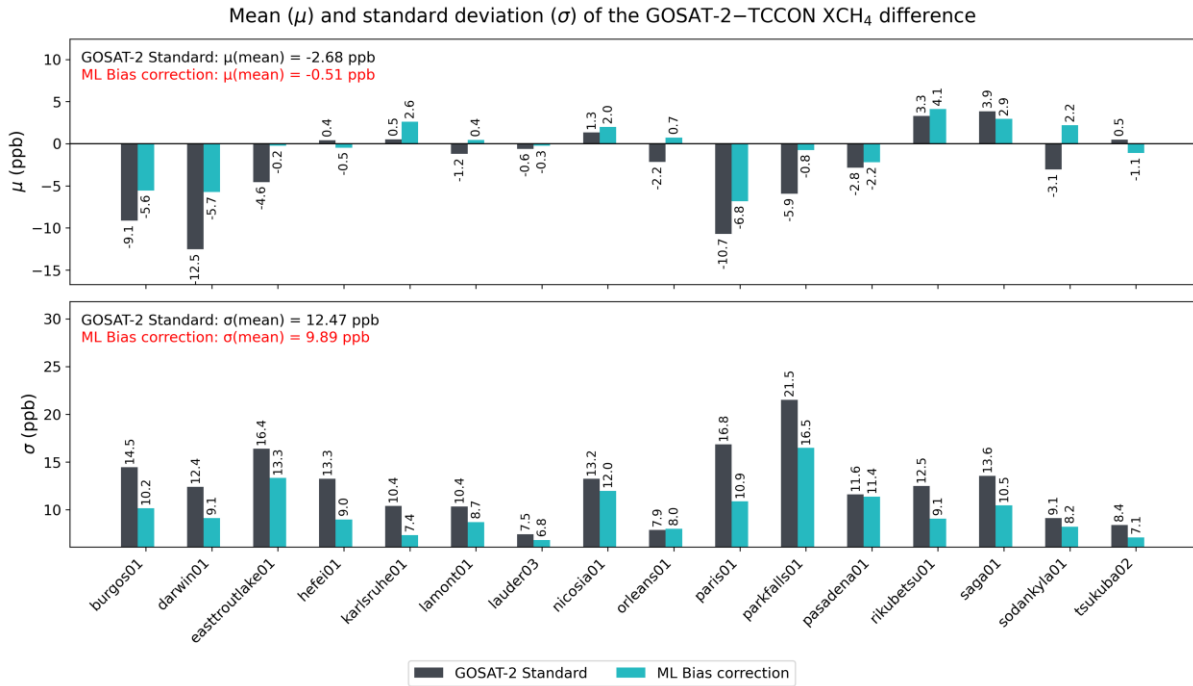

86

87

88 **Figure S5.** Global coverage comparison between TROPOMI and fused XCH<sub>4</sub> products (2020–  
 89 2023). (a) Annual global land coverage showing TROPOMI official product (grey) and fused  
 90 product (green), with percentage improvement indicated for each year. (b) Monthly relative  
 91 coverage improvement of fused product over TROPOMI for each year from 2020–2023,  
 92 demonstrating temporal resilience during TROPOMI data gaps in July–August 2022 and  
 93 August 2023 caused by missing VIIRS cloud screening data.  
 94

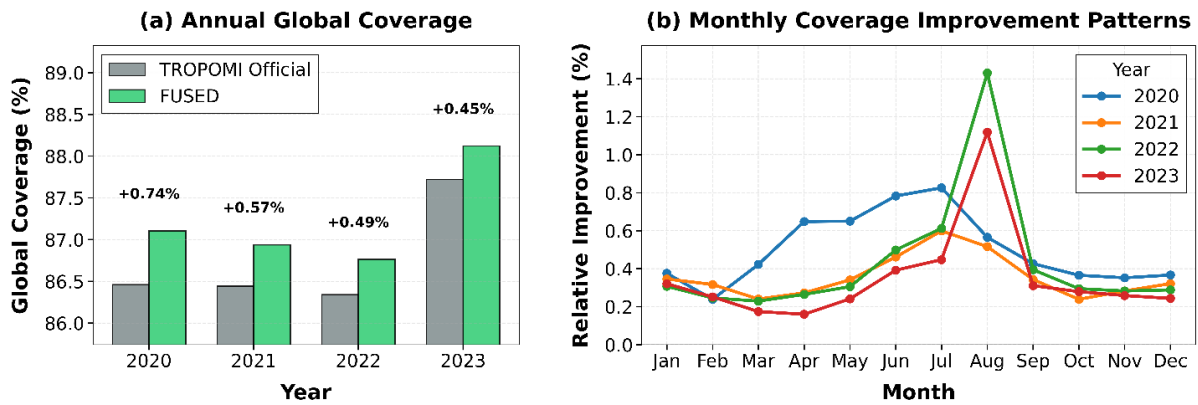

95
